# Supplementary material for: Intercropping Practices in Mediterranean Mandarin Orchards from an Environmental and Economic Perspective
Source: MDPI journal article supplement (doi:10.3390/agriculture12050574), 2022-04-19
Supplement: s1 [file s1]

Supplementary Materials

# Intercropping Practices in Mediterranean Mandarin Orchards from an Environmental and Economic Perspective

Bernardo Martin-Gorriz<sup>1</sup>, José A. Zabala<sup>2</sup>, Virginia Sánchez-Navarro<sup>3</sup>, Belén Gallego-Elvira<sup>1,\*</sup>, Víctor Martínez-García<sup>2</sup>, Francisco Alcon<sup>2</sup>, José Francisco Maestre-Valero<sup>1</sup>

<sup>1</sup> Irrigation Design and Management Research Group, Department of Agricultural Engineering, Technical University of Cartagena, Paseo Alfonso XIII 48, 30203 Cartagena, Spain; b.martin@upct.es (B.M.-G); belen.gallego@upct.es (B.G.-E.); josef.maestre@upct.es (J.F.M.-V.).

<sup>2</sup> Agricultural Economics Research Group, Department of Business Economics, Technical University of Cartagena, Paseo Alfonso XIII, 48, 30203 Cartagena, Spain; joseangel.zabala@upct.es (J.A.Z.); victor.martinez@upct.es (V.M.G.); francisco.alcon@upct.es (F.A.).

<sup>3</sup> Sustainable Use, Management, and Reclamation of Soil and Water Research Group, Department of Agricultural Engineering, Technical University of Cartagena, Paseo Alfonso XIII 48, 30203, Cartagena, Spain; virginia.sanchez@upct.es (V.S.-N.).

\* Correspondence: belen.gallego@upct.es; Tel.: +34 968177741

## Supplementary Materials

**Table S1.** Monthly meteorological data during the study period from MU52 weather station (37° 58' 39"; 0° 59' 1"; 125 m a.s.l.) of the Agricultural Information System of Murcia (<http://siam.imida.es>).

| Year | Month | Air Temperature (°C) |                  | Relative Humidity (%) |        | Solar Radiation (w/m2) | Rainfall (mm) |
|------|-------|----------------------|------------------|-----------------------|--------|------------------------|---------------|
|      |       | C                    | Wind Speed (m/s) | (%)                   |        |                        |               |
| 2018 | 9     | 23.87                | 1.44             | 69.39                 | 207.57 |                        | 36.4          |
|      | 10    | 18.92                | 1.53             | 69.68                 | 154.72 |                        | 43.4          |
|      | 11    | 14.75                | 1.6              | 68.55                 | 112.72 |                        | 137.9         |
|      | 12    | 14.42                | 1.37             | 66.19                 | 109.52 |                        | 6.3           |
| 2019 | 1     | 13.06                | 1.89             | 54.49                 | 120.35 |                        | 1.6           |
|      | 2     | 14.17                | 1.67             | 61.18                 | 164.38 |                        | 0.4           |
|      | 3     | 16.48                | 1.61             | 58.51                 | 204.92 |                        | 21.5          |
|      | 4     | 15.98                | 1.96             | 63.15                 | 232.49 |                        | 137.7         |
|      | 5     | 19.48                | 1.76             | 61.42                 | 309.08 |                        | 5.1           |
|      | 6     | 23.59                | 1.96             | 54.71                 | 344.37 |                        | 1.9           |
|      | 7     | 27.45                | 2                | 55.84                 | 309.38 |                        | 0             |
|      | 8     | 26.83                | 1.59             | 64.63                 | 277.28 |                        | 67.5          |
|      | 9     | 23.62                | 1.5              | 73.81                 | 205.23 |                        | 226.2         |
|      | 10    | 20.91                | 1.23             | 66.96                 | 170.06 |                        | 21.2          |
|      | 11    | 15.42                | 2.28             | 54.55                 | 128.68 |                        | 12.7          |
|      | 12    | 13.72                | 1.71             | 68.67                 | 90.91  |                        | 45.5          |
| 2020 | 1     | 11.07                | 1.04             | 74.92                 | 108.65 |                        | 81            |
|      | 2     | 15.17                | 1.29             | 68.36                 | 161.25 |                        | 2.6           |
|      | 3     | 14.84                | 1.94             | 65.6                  | 166.46 |                        | 136.6         |
|      | 4     | 16.13                | 1.54             | 75.4                  | 211.89 |                        | 53.5          |

|      |    |       |      |       |        |      |
|------|----|-------|------|-------|--------|------|
|      | 5  | 21.99 | 1.69 | 61.48 | 301.2  | 41.1 |
|      | 6  | 24.88 | 1.78 | 59.44 | 323.78 | 6.3  |
|      | 7  | 27.89 | 1.85 | 65.61 | 325.7  | 6.6  |
|      | 8  | 29.66 | 1.61 | 59.58 | 290.4  | 7.9  |
|      | 9  | 25.22 | 1.44 | 63.75 | 227.12 | 4.1  |
|      | 10 | 18.97 | 1.47 | 55.65 | 181.89 | 3.3  |
|      | 11 | 15.9  | 1.13 | 76.77 | 120.68 | 6.8  |
|      | 12 | 12.38 | 1.75 | 56.01 | 107.59 | 1.5  |
| 2021 | 1  | 11.39 | 1.81 | 56.9  | 112.57 | 44.3 |
|      | 2  | 13.95 | 1.65 | 64.21 | 133.57 | 0.1  |
|      | 3  | 13.18 | 1.56 | 71.41 | 188.12 | 70   |
|      | 4  | 15.25 | 1.63 | 74    | 200.58 | 52.9 |
|      | 5  | 19.84 | 1.93 | 60.68 | 297.45 | 39.3 |
|      | 6  | 23.13 | 1.78 | 63.83 | 306.04 | 22   |

**Table S2.** Sowing and harvesting dates in mandarin monoculture (CTL) and diversification treatments (D1 and D2) during three crop cycles.

| Cycle     | Item            | MC         | D1         |              | D2         |            |            |                 |
|-----------|-----------------|------------|------------|--------------|------------|------------|------------|-----------------|
|           |                 | Mandarin   | Mandarin   | Barley-vetch | Fava bean  | Mandarin   | Fava bean  | Purslane Cowpea |
| 2018-2019 | Sowing date     | -          | -          | 13/03/2018   | 14/09/2018 | -          | 14/09/2018 | - -             |
|           | Harvesting date | 24/01/2019 | 24/01/2019 | -*           | 09/01/2019 | 24/01/2019 | 09/01/2019 | - -             |
| 2019-2020 | Sowing          | -          | -          | 31/01/2019   | 04/09/2019 | -          | -          | 06/05/2019 -    |
|           | Harvesting date | 07/01/2020 | 07/01/2020 | 13/06/2019   | 23/12/2019 | 07/01/2020 | -          | 06/07/2019 -    |
| 2020-2021 | Sowing date     | -          | -          | 18/02/2020   | 10/09/2020 | -          | -          | - 29/06/2020    |
|           | Harvesting date | 03/02/2021 | 03/02/2021 | 22/06/2020   | 12/02/2021 | 03/02/2021 | -          | - 22/09/2020    |

\* There was no emergence of the seeds.

**Table S3.** Primary input/output data for mandarin monoculture (CTL) and mandarin with inter-crops D1 and D2 during three crop cycles.

| Cycle     | Item                                             | CTL           | D1           |              | D2         |             |           |                 |
|-----------|--------------------------------------------------|---------------|--------------|--------------|------------|-------------|-----------|-----------------|
|           |                                                  | Mandarin      | Mandarin     | Barley-vetch | Fava bean  | Mandarin    | Fava bean | Purslane Cowpea |
| 2018-2019 | Seeds (kg/ha)                                    | -             | -            | 112.5-37.5   | 50         | -           | 50        | - -             |
|           | Water for irrigation (m <sup>3</sup> /ha)        | 3667          | 2010         | 1            | 12         | 2010        | 59        | - -             |
|           | Electricity for irrigation (kWh/ha)              | 6124          | 3357         | -            | 20         | 3357        | 99        | - -             |
|           | Rainfall (m <sup>3</sup> /ha) <sup>2</sup>       | 3078          | 3078         | -            | 1801       | 3078        | 1801      | - -             |
|           | Fertilizers <sup>3</sup>                         |               |              |              |            |             |           |                 |
|           | N (kg/ha)                                        | 177           | 177          | -            | -          | 177         | -         | - -             |
|           | P <sub>2</sub> O <sub>5</sub> (kg/ha)            | 36            | 36           | -            | -          | 36          | 4         | - -             |
|           | K <sub>2</sub> O (kg/ha)                         | 126           | 126          | -            | -          | 126         | 2         | - -             |
|           | Fungicides and insecticides <sup>4</sup> (kg/ha) | 12            | 12           | -            | 2          | 12          | 2         | - -             |
|           | Herbicides <sup>5</sup> (kg/ha)                  | 9.5           | -            | -            | -          | -           | -         | - -             |
|           | Diesel for field operations (L/ha)               | 186           | 77           | -            | 96         | 77          | 99        | - -             |
|           | Time to process <sup>6</sup> (h/ha)              | 17            | 7            | -            | 9          | 7           | 9         | - -             |
|           | Yield <sup>7</sup> (kg/ha)                       | 20,922 ± 2509 | 14,676 ± 869 | -            | 1020 ± 254 | 8724 ± 6069 | 380 ± 349 | - -             |

|           |                                                  |               |               |            |            |                 |   |                   |          |
|-----------|--------------------------------------------------|---------------|---------------|------------|------------|-----------------|---|-------------------|----------|
| 2019-2020 | Seeds (kg/ha)                                    | -             | -             | 112.5-37.5 | 50         | -               | - | 5000 <sup>7</sup> | -        |
|           | Water for irrigation (m <sup>3</sup> /ha)        | 4000          | 2553          | 966        | 817        | 2553            | - | 525               | -        |
|           | Electricity for irrigation (kWh/ha)              | 6680          | 4264          | 1613       | 1364       | 4264            | - | 877               | -        |
|           | Rainfall (m <sup>3</sup> /ha) <sup>2</sup>       | 5099          | 5099          | 2448       | 3305       | 5099            | - | 75                | -        |
|           | Fertilizers <sup>3</sup>                         |               |               |            |            |                 |   |                   |          |
|           | N (kg/ha)                                        | 149           | 149           | 13         | 11         | 149             | - | 15                | -        |
|           | P <sub>2</sub> O <sub>5</sub> (kg/ha)            | 65            | 65            | 9          | 18         | 65              | - | 14                | -        |
|           | K <sub>2</sub> O (kg/ha)                         | 121           | 121           | 8          | 14         | 121             | - | 14                | -        |
|           | Fungicides and insecticides <sup>4</sup> (kg/ha) | 22            | 22            | -          | -          | 22              | - | -                 | -        |
|           | Herbicides <sup>5</sup> (kg/ha)                  | 9.5           | -             | -          | -          | -               | - | -                 | -        |
|           | Diesel for field operations (L/ha)               | 175           | 66            | 120        | 120        | 66              | - | 120               | -        |
| 2020-2021 | Time to process <sup>6</sup> (h/ha)              | 16            | 6             | 11         | 11         | 6               | - | 11                | -        |
|           | Yield <sup>7</sup> (kg/ha)                       | 45,436 ± 3221 | 18,107 ± 3852 | 4728 ± 447 | 1344 ± 241 | 18,211 ± 12,575 | - | 7682 ± 438        |          |
|           | Seeds (kg/ha)                                    | -             | -             | 112.5-37.5 | 50         | -               | - | -                 | 9.2      |
|           | Water for irrigation (m <sup>3</sup> /ha)        | 3793          | 3427          | 329        | 954        | 3427-           | - | -                 | 955      |
|           | Electricity for irrigation (kWh/ha)              | 6334          | 5723          | 549        | 1593       | 5723            | - | -                 | 1595     |
|           | Rainfall (m <sup>3</sup> /ha) <sup>2</sup>       | 3454          | 3454          | 2641       | 184        | 3454            | - | -                 | 119      |
|           | Fertilizers <sup>3</sup>                         |               |               |            |            |                 |   |                   |          |
|           | N (kg/ha)                                        | 122           | 122           | 10         | 10         | 122             | - | -                 | 43       |
|           | P <sub>2</sub> O <sub>5</sub> (kg/ha)            | 18            | 18            | 6          | -          | 18              | - | -                 | 6        |
|           | K <sub>2</sub> O (kg/ha)                         | 93            | 93            | 9          | 6          | 93              | - | -                 | 28       |
|           | Fungicides and insecticides <sup>4</sup> (kg/ha) | 27            | 27            | -          | -          | 27              | - | -                 | -        |
|           | Herbicides <sup>5</sup> (kg/ha)                  | 9.5           | -             | -          | -          | -               | - | -                 | -        |
|           | Diesel for field operations (L/ha)               | 219           | 120           | 120        | 175        | 120             | - | -                 | 153      |
|           | Time to process <sup>6</sup> (h/ha)              | 20            | 11            | 11         | 16         | 11              | - | -                 | 14       |
|           | Yield <sup>7</sup> (kg/ha)                       | 11,979 ± 1517 | 11,423 ± 5711 | 1417 ± 245 | 2692 ± 469 | 7685 ± 1872     | - | -                 | 124 ± 35 |

<sup>1</sup> The first year there was no emergence of the seeds.

<sup>2</sup> Agricultural Information System of Murcia ([www.siam.es](http://www.siam.es)).

<sup>3</sup> Commercial fertilizers: Neptuno PK 28, Neptuno Triton, Neptuno Pandora, Neptuno K10 and Urano oxigen (Medifer, Constantino Gutiérrez, SA).

<sup>4</sup> Commercial fungicides and insecticides: Spirodiclofen 24%; Spirotetramat 15%; Delmatettrin 2.5%; Bacilus Sp; Abamectine; Copper oxychloride; Mancozeb 80. To account for these pesticides, the processes of a generic pesticide were used: 'Pesticide, unspecified GLO market for'.

<sup>5</sup> Commercial herbicides: Glyphosate 8 L/ha; Oxifluorfen 1.5 L/ha.

<sup>6</sup> For the machinery subsystem used for field operations, the following was considered: (1) 'Tractor, 4 wheel, agricultural GLO market for' according to weight 2800 kg; lifetime 16000 h; (2) 'Agriculture machinery unspecified GLO market for'.

<sup>7</sup> Mean ± Standard deviation.

**Table S4.** Primary input data used for the irrigation subsystem for mandarin monoculture (CTL) and mandarin with intercrops D1 and D2.

| Item                                                                                                | CTL      | D1       |              |           | D2       |           |          |        |
|-----------------------------------------------------------------------------------------------------|----------|----------|--------------|-----------|----------|-----------|----------|--------|
|                                                                                                     | Mandarin | Mandarin | Barley-vetch | Fava bean | Mandarin | Fava bean | Purslane | Cowpea |
| Polyethylene, high density, granulate, recycled ROW market for (pipeline) (kg/ha-cycle)             | 85       | 85       | 19           | 19        | 85       | 19        | 19       | 19     |
| Polyvinylidenechloride, granulate, ROW production (pipeline) (kg/ha-cycle)                          | 68       | 68       | -            | -         | 68       | -         | -        | -      |
| Extrusion, plastic pipes GLO market for (pipeline) (kg/ha-cycle)                                    | 153      | 153      | 19           | 19        | 153      | 19        | 19       | 19     |
| Polyethylene, high density, granulate, recycled ROW market for PE (tanks fertilizers) (kg/ha-cycle) | 36       | 36       | -            | -         | 36       | -         | -        | -      |
| Injection moulding GLO market for (tanks fertilizers) (kg/ha-cycle)                                 | 36       | 36       | -            | -         | 36       | -         | -        | -      |
| Steel, chromium steel 18/8 GLO market (pump system) (kg/ha-cycle)                                   | 2        | 2        | -            | -         | 2        | -         | -        | -      |
| Agriculture machinery unspecified GLO market for (reservoir) (kg/ha-cycle)                          | 22       | 22       | -            | -         | 22       | -         | -        | -      |
| Polyethylene, high density, granulate, recycled ROW market for PE (kg/ha-cycle)                     | 71       | 71       | -            | -         | 71       | -         | -        | -      |
| Polyvinylidenechloride, granulate, ROW production (reservoir) (kg/ha-cycle)                         | 71       | 71       | -            | -         | 71       | -         | -        | -      |
| Transport of materials (Lorry 3.5-16 t) (tkm/cycle)                                                 | 13       | 13       | 1            | 1         | 13       | 1         | 1        | 1      |
| Transport inert materials to Landfill (Lorry 3.5-7.5 t EURO6) (tkm/cycle)                           | 13       | 13       | 1            | 1         | 13       | 1         | 1        | 1      |
| Shed GLO market for (m <sup>2</sup> /cycle)                                                         | 0.02     | 0.02     | -            | -         | 0.02     | -         | -        | -      |

Lifespan of materials: reservoir 20 years; head system 20 years; PE 10 years; PVC 20 years.

**Table S5.** Quality evaluation of the primary input data. Self-evaluation against the ILCD data quality indicators of EC-JRC.

| Indicator                                      | Definition                                                                                                                                   | Dataset evaluation                                                                                                                                                      | Quality rating | Quality level       |
|------------------------------------------------|----------------------------------------------------------------------------------------------------------------------------------------------|-------------------------------------------------------------------------------------------------------------------------------------------------------------------------|----------------|---------------------|
| Technological representativeness               | Degree to which the data set reflects the true population of interest regarding technology                                                   | The technology for crops production in Region of Murcia is highly standardized within the population of farms exporting to Europe.                                      | 1              | very good           |
| Geographical representativeness                | Degree to which the data set reflects the true population of interest regarding geography                                                    | The data sources used was obtained in the same region that represent (Region of Murcia area)                                                                            | 1              | very good           |
| Time-related representativeness                | Degree to which the data set reflects the true population of interest regarding time / age of the data                                       | Fully time-representative data, i.e. data for accounting 2018 to 2020 in crop productivity, fertilizer, pesticides, machinery use, irrigation systems and electricity   | 1              | very good           |
| Completeness                                   | Share of (elementary) flows that are quantitatively included in the inventory                                                                | All known inventory flows were quantified, included waste flows                                                                                                         | 1              | very good           |
| Precision / uncertainty                        | Measure of the variability of the data values for each data expressed                                                                        | Data are based on measurements, and the calculation is based partly on assumptions                                                                                      | 2              | good                |
| Methodological appropriateness and consistency | The applied LCI methods and methodological choices (e.g. allocation, substitution, etc.) are in line with the goal and scope of the data set | - Allocation choices are in line with the function studied<br>- Best available field emissions estimation methods were selected accounting for the system specificities | 1              | very good           |
| <b>Overall data quality rating</b>             |                                                                                                                                              |                                                                                                                                                                         | <b>≤1.6</b>    | <b>High quality</b> |

**Table S6.** Quality evaluation of the input data from ecoinvent database. Self-evaluation against the ILCD data quality indicators of EC-JRC.

| Indicator                                      | Definition                                                                                                                                   | Dataset evaluation                                                                                                                       | Quality rating       | Quality level        |
|------------------------------------------------|----------------------------------------------------------------------------------------------------------------------------------------------|------------------------------------------------------------------------------------------------------------------------------------------|----------------------|----------------------|
| Technological representativeness               | Degree to which the data set reflects the true population of interest regarding technology                                                   | The technological characteristics including operating conditions                                                                         | 1                    | very good            |
| Geographical representativeness                | Degree to which the data set reflects the true population of interest regarding geography                                                    | All inputs were manufacture in Europe (fertilizers, pesticides, farm machinery, plastics, cast iron, etc.)                               | 1                    | Very good            |
| Time-related representativeness                | Degree to which the data set reflects the true population of interest regarding time / age of the data                                       | Fully time-representative data up-date (Ecoinvent database v 3.7.1)                                                                      | 1                    | very good            |
| Completeness                                   | Share of (elementary) flows that are quantitatively included in the inventory                                                                | All known inventory flows were quantified, included waste flows                                                                          | 1                    | very good            |
| Precision / uncertainty                        | Measure of the variability of the data values for each data expressed                                                                        | A "fair" quality was given as a default because relative standard deviation for the overall environmental impact could not be quantified | 3                    | fair                 |
| Methodological appropriateness and consistency | The applied LCI methods and methodological choices (e.g. allocation, substitution, etc.) are in line with the goal and scope of the data set | All data in the Ecoinvent database are reviewed against data quality guidelines in accordance with ILCD handbook                         | 1                    | very good            |
| <b>Overall data quality rating</b>             |                                                                                                                                              |                                                                                                                                          | <b>&gt;1.6 to ≤3</b> | <b>Basic quality</b> |

**Table S7.** Mean values of impact categories per unit of area (ha) in mandarin monoculture (CTL), diversification 1 (D1) and diversification 2 (D2).

| Impact category | Treatment |         |         | Mean  |
|-----------------|-----------|---------|---------|-------|
|                 | CTL       | D1      | D2      |       |
| ADe             | 0.063 a   | 0.065 a | 0.064 a | 0.064 |
| ADf             | 65834 a   | 64782 a | 60342 a | 63653 |
| AC              | 49 a      | 47 a    | 46 a    | 47    |
| EU              | 15 a      | 16 a    | 15 a    | 16    |
| GW              | 6893 a    | 6744 a  | 6472 a  | 6703  |
| WU              | 3820 a    | 3351 a  | 3007 a  | 3393  |

Impact categories: Abiotic depletion elements (ADe); Abiotic depletion fossil fuels (ADf); Acidification (AC); Eutrophication (EU); Global warming (GW); and Water use (WU). Treatments: mandarin monoculture (CTL); diversification D1 (D1); and diversification D2 (D2).

Treatments with different letters had significant differences according to Tukey's multiple range test at 95.0%. Significance level \*P<0.05

**Table S8.** Mean value and standard deviation for the potential environmental impacts per kg of product harvested in mandarin monoculture (CTL), diversification D1 (D1) and diversification D2 (D2) by crop.

| Impact categories | Units                                              | CTL                 |                     | D1                  |                     | D2                  |                     |                     |                     |
|-------------------|----------------------------------------------------|---------------------|---------------------|---------------------|---------------------|---------------------|---------------------|---------------------|---------------------|
|                   |                                                    | Mandarin            | Mandarin            | Barley/vetch        | Fava bean           | Mandarin            | Fava bean           | Purslane            | Cowpea              |
|                   |                                                    | Mean ± SD           |
| ADe               | kg Sb <sub>eq</sub> /kg                            | 3.26E-06 ± 2.30E-06 | 4.17E-06 ± 1.28E-06 | 1.22E-06 ± 7.46E-07 | 2.08E-06 ± 1.03E-06 | 4.17E-06 ± 1.28E-06 | 2.47E-06 ± 4.64E-07 | 3.67E-07 ± 2.16E-08 | 4.29E-05 ± 1.41E-05 |
| ADf               | MJ/kg                                              | 3.34 ± 1.99         | 3.46 ± 0.61         | 3.71 ± 2.16         | 5.23 ± 1.59         | 3.46 ± 0.61         | 3.71 ± 0.70         | 1.08 ± 0.06         | 106.52 ± 35.01      |
| AC                | kg SO <sub>2</sub> <sub>eq</sub> /kg               | 2.46E-03 ± 1.39E-03 | 2.63E-03 ± 3.70E-04 | 2.30E-03 ± 1.22E-03 | 3.04E-03 ± 1.33E-03 | 2.63E-03 ± 3.70E-04 | 1.75E-03 ± 3.28E-04 | 7.06E-04 ± 4.16E-05 | 8.03E-02 ± 2.64E-02 |
| EU                | kg PO <sub>4</sub> <sup>3-</sup> <sub>eq</sub> /kg | 7.69E-04 ± 4.15E-04 | 8.96E-04 ± 1.20E-04 | 8.73E-04 ± 5.37E-04 | 9.00E-04 ± 3.82E-04 | 8.96E-04 ± 1.20E-04 | 5.65E-04 ± 1.06E-04 | 2.02E-04 ± 1.19E-05 | 2.45E-02 ± 8.06E-03 |
| GW                | kg CO <sub>2</sub> <sub>eq</sub> /kg               | 0.35 ± 0.20         | 0.38 ± 0.06         | 0.32 ± 0.17         | 0.42 ± 0.17         | 0.38 ± 0.06         | 0.25 ± 0.05         | 0.11 ± 0.01         | 10.85 ± 3.57        |
| WU                | m <sup>3</sup> /kg                                 | 0.19 ± 0.12         | 0.19 ± 0.08         | 0.15 ± 0.01         | 0.22 ± 0.20         | 0.19 ± 0.08         | 0.03 ± 0.01         | 0.05 ± 0.00         | 5.48 ± 1.80         |

Impact categories: Abiotic depletion elements (ADe); Abiotic depletion fossil fuels (ADf); Acidification (AC); Eutrophication (EU); Global warming (GW); and Water use (WU).

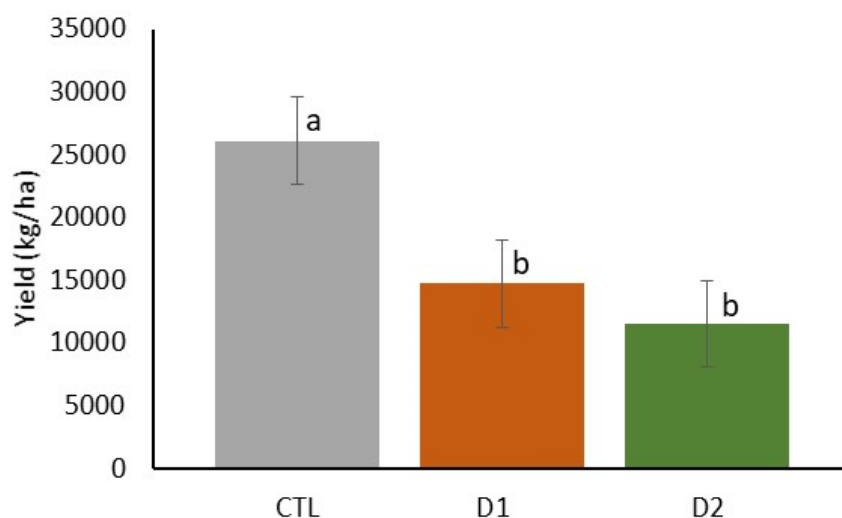**Figure S1.** Mandarin fruit yield and standard error.

The values are means of three replicates by three years (n = 9). The error bars denote the standard error of the mean. Treatments with different letters had significant differences according to Fisher (LSD) at 95.0%.

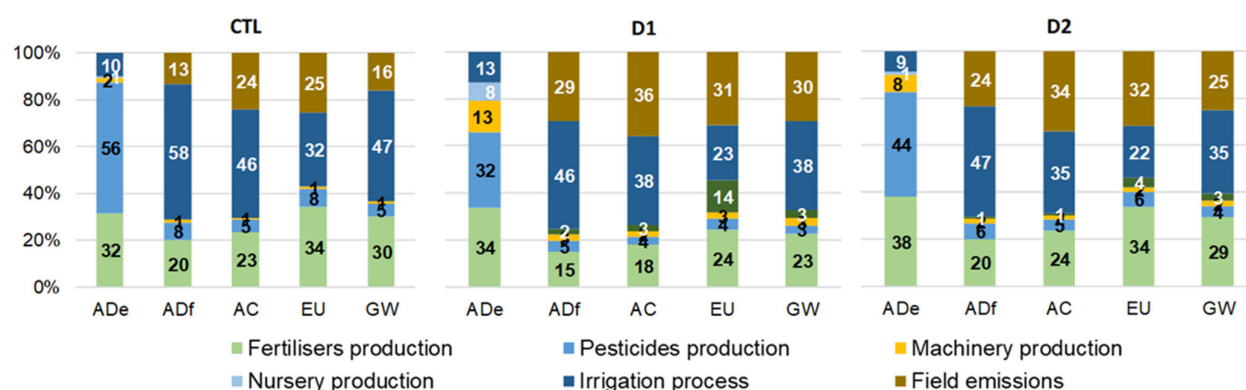

**Figure S2.** Subsystem contributions to selected impact categories for mandarin monoculture (CTL), diversification 1 (D1) and diversification 2 (D2). Impact categories: Abiotic depletion elements (ADe); Abiotic depletion fossil fuels (ADf); Acidification (AC); Eutrophication (EU); Global warming (GW). Subsystems: Fertilisers production, Pesticides production, Machinery production, Nursery production, Irrigation process, Field emissions.

**Table S9.** Contributions to reduction of fertilizer doses versus the reference situation by impact category in mandarin monoculture (CTL), diversification 1 (D1) and diversification 2 (D2).

| Impact category | Reference | Fertilizer reduction doses |    |    |     |    |    |
|-----------------|-----------|----------------------------|----|----|-----|----|----|
|                 |           | 10%                        |    |    | 20% |    |    |
|                 |           | CTL                        | D1 | D2 | CTL | D1 | D2 |
| ADe             | 100       | 96                         | 96 | 96 | 91  | 91 | 91 |
| ADf             | 100       | 98                         | 98 | 97 | 95  | 95 | 95 |
| AC              | 100       | 97                         | 97 | 97 | 94  | 94 | 94 |
| EU              | 100       | 97                         | 97 | 97 | 94  | 94 | 94 |
| GW              | 100       | 98                         | 98 | 98 | 96  | 96 | 96 |

Impact categories: Abiotic depletion elements (ADe); Abiotic depletion fossil fuels (ADf); Acidification (AC); Eutrophication (EU); and Global warming (GW).

**Table S10.** Average 2018-20 values of costs, revenues and gross margins for the mandarin monoculture (CTL), diversification 1 (D1), and diversification 2 (D2).

| €/ha            | CTL               |              | Barley-<br>vetch | D1           |            | D2                 |              |              |              |              |
|-----------------|-------------------|--------------|------------------|--------------|------------|--------------------|--------------|--------------|--------------|--------------|
|                 | Mandarin Mandarin |              |                  | Fava bean    | Total      | Mandarin Fava bean |              | Purslane     | Cowpea       | Total        |
|                 | Mean ±<br>SD      | Mean ±<br>SD |                  | Mean ±<br>SD | Mean ± SD  | Mean ± SD          | Mean ±<br>SD | Mean ±<br>SD | Mean ±<br>SD | Mean ±<br>SD |
| Revenues        |                   |              |                  |              |            |                    |              |              |              |              |
| Sales           | 8,635.73 ±        | 4,874.21 ±   | 386.43 ±         | 2,520.44 ±   | 7,652.26 ± | 3,816.63 ±         | 568.32 ±     | 7,682.37 ±   | 187.52 ±     | 6,629.37 ±   |
|                 | 5,013.68          | 1,495.68     | 231.63           | 1,229.14     | 1,534.09   | 2,861.41           | 522.03       | 437.84       | 52.61        | 5,776.42     |
| CAP Subsidies   | 325.00 ±          | 325.00 ±     |                  |              | 325.00 ±   | 325.00 ±           |              |              |              | 325.00 ±     |
|                 | 0.00              | 0.00         |                  |              | 0.00       | 0.00               |              |              |              | 0.00         |
| TOTAL REVENUES  | 8,960.73a         | 5,199.21 ±   | 386.43 ±         | 2,520.44 ±   | 7,977.26a  | 4,141.63 ±         | 568.32 ±     | 7,682.37 ±   | 187.52 ±     | 6,954.37a    |
|                 | ± 5,013.68        | 1,495.68     | 231.63           | 1,229.14     | 1,534.09   | 2,861.41           | 522.03       | 437.84       | 52.61        | 5,776.42     |
| Machinery costs |                   |              |                  |              |            |                    |              |              |              |              |
| Ploughing       | 105.00 ±          |              | 210.00 ±         | 227.50 ±     | 367.50 ±   |                    | 157.50 ±     | 210.00 ±     | 210.00 ±     | 192.50 ±     |
|                 | 0.00              |              | 0.00             | 69.45        | 163.93     |                    | 0.00         | 0.00         | 0.00         | 26.25        |
| Sowing          |                   |              | 105.00 ±         |              | 105.00 ±   |                    |              |              |              |              |
|                 |                   |              | 0.00             |              | 0.00       |                    |              |              |              |              |

|                                    |                      |                     |                   |                   |                      |                     |                    |                   |                   |                      |
|------------------------------------|----------------------|---------------------|-------------------|-------------------|----------------------|---------------------|--------------------|-------------------|-------------------|----------------------|
| Phytosanitary treatments           | 135.00 ± 38.97       | 135.00 ± 38.97      |                   |                   | 135.00 ± 38.97       | 135.00 ± 38.97      |                    |                   |                   | 135.00 ± 38.97       |
| Herbicide treatments               | 180.00 ± 0.00        |                     |                   |                   |                      |                     |                    |                   |                   |                      |
| Shredding of pruning/crop residues | 100.00 ± 79.37       | 100.00 ± 79.37      |                   | 120.00 ± 22.50    | 220.00 ± 97.50       | 100.00 ± 79.37      | 105.00 ± 0.00      | 105.00 ± 0.00     | 105.00 ± 0.00     | 205.00 ± 79.37       |
| Total machinery                    | 520.00a ± 61.39      | 235.00 ± 61.39      | 315.00 ± 0.00     | 347.50 ± 91.01    | 792.50a ± 269.87     | 235.00 ± 61.39      | 262.50 ± 0.00      | 315.00 ± 0.00     | 315.00 ± 0.00     | 532.50a ± 73.77      |
| <b>Raw material costs</b>          |                      |                     |                   |                   |                      |                     |                    |                   |                   |                      |
| Plants/seeds                       |                      |                     | 93.75 ± 0.00      | 443.67 ± 0.00     | 506.17 ± 46.87       |                     | 443.67 ± 0.00      | 2,100.00 ± 0.00   | 17.70 ± 0.00      | 853.79 ± 952.68      |
| Phytosanitary products             | 438.49 ± 71.54       | 438.49 ± 71.54      |                   | 5.70 ± 8.55       | 444.18 ± 74.84       | 438.49 ± 71.54      | 17.09 ± 0.00       |                   |                   | 444.18 ± 74.84       |
| Herbicides                         | 71.85 ± 0.00         |                     |                   |                   |                      |                     |                    |                   |                   |                      |
| Fertilizers                        | 715.73 ± 183.30      | 715.73 ± 183.30     | 45.11 ± 9.31      | 27.85 ± 24.92     | 773.65 ± 223.89      | 715.73 ± 183.30     | 8.11 ± 0.00        | 61.35 ± 0.00      | 7.39 ± 0.00       | 741.35 ± 210.07      |
| Total raw material                 | 1,226.06a ± 238.53   | 1,154.22 ± 238.53   | 138.86 ± 9.31     | 477.22 ± 18.70    | 1,724.01a ± 289.00   | 1,154.22 ± 238.53   | 468.88 ± 0.00      | 2,161.35 ± 0.00   | 25.10 ± 0.00      | 2,039.33a ± 1,214.19 |
| <b>Irrigation costs</b>            |                      |                     |                   |                   |                      |                     |                    |                   |                   |                      |
| Irrigation water                   | 840.40 ± 32.06       | 585.93 ± 136.17     | 142.46 ± 76.86    | 130.73 ± 96.98    | 811.63 ± 277.40      | 585.93 ± 136.17     | 13.06 ± 0.00       | 115.44 ± 0.00     | 210.07 ± 0.00     | 698.79 ± 220.86      |
| Electricity                        | 85.66 ± 3.27         | 59.72 ± 13.88       | 14.52 ± 7.83      | 13.32 ± 9.88      | 82.72 ± 28.27        | 59.72 ± 13.88       | 1.33 ± 0.00        | 11.77 ± 0.00      | 21.41 ± 0.00      | 71.22 ± 22.51        |
| Total irrigation                   | 926.06a ± 35.33      | 645.65 ± 150.05     | 156.98 ± 84.69    | 144.05 ± 106.86   | 894.36a ± 305.68     | 645.65 ± 150.05     | 14.39 ± 0.00       | 127.20 ± 0.00     | 231.49 ± 0.00     | 770.01a ± 243.37     |
| <b>Labour costs</b>                |                      |                     |                   |                   |                      |                     |                    |                   |                   |                      |
| Planting/sowing                    |                      |                     |                   | 260.42 ± 0.00     | 260.42 ± 0.00        |                     | 260.42 ± 0.00      | 1,273.13 ± 0.00   | 520.83 ± 0.00     | 684.79 ± 455.43      |
| Phytosanitary treatments           | 15.00 ± 22.50        | 15.00 ± 22.50       |                   | 60.00 ± 90.00     | 75.00 ± 81.12        | 15.00 ± 22.50       | 180.00 ± 0.00      |                   |                   | 75.00 ± 81.12        |
| Herbicide treatments               | 90.00 ± 0.00         |                     |                   |                   |                      |                     |                    |                   |                   |                      |
| Pruning                            | 369.21 ± 281.32      | 369.21 ± 281.32     |                   |                   | 369.21 ± 281.32      | 369.21 ± 281.32     |                    |                   |                   | 369.21 ± 281.32      |
| Harvesting                         |                      |                     | 998.26 ± 47.55    | 719.41 ± 328.97   | 1,384.92 ± 719.23    |                     | 480.00 ± 0.00      | 1,087.50 ± 0.00   | 325.52 ± 0.00     | 631.01 ± 348.84      |
| Other operations                   | 22.50 ± 0.00         | 217.81 ± 0.00       | 45.00 ± 0.00      | 30.00 ± 22.50     | 277.81 ± 22.50       | 152.71 ± 97.66      | 45.00 ± 0.00       | 45.00 ± 0.00      | 45.00 ± 0.00      | 197.71 ± 97.66       |
| Total labour                       | 496.71a ± 296.33     | 602.03 ± 296.33     | 1,043.26 ± 47.55  | 1,069.83 ± 267.86 | 2,367.36b ± 720.16   | 536.92 ± 284.42     | 965.42 ± 0.00      | 2,405.63 ± 0.00   | 891.35 ± 0.00     | 1,957.72b ± 513.88   |
| <b>TOTAL VARIABLE COSTS</b>        | 3,168.83a ± 91.73    | 2,636.90 ± 231.31   | 1,654.10 ± 141.55 | 2,038.60 ± 412.61 | 5,778.23b ± 1,266.55 | 2,571.79 ± 291.12   | 1,711.19 ± 0.00    | 5,009.17 ± 0.00   | 1,462.94 ± 0.00   | 5,299.56b ± 1,649.10 |
| <b>GROSS MARGIN<sup>1</sup></b>    | 5,791.89a ± 5,094.18 | 2,562.31 ± 1,635.55 | -1,267.68 ± 95.54 | 481.84 ± 856.49   | 2,199.03a ± 1,373.43 | 1,569.84 ± 2,931.25 | -1,142.87 ± 522.03 | 2,673.20 ± 437.84 | -1,275.42 ± 52.61 | 1,654.81a ± 4,334.91 |
| Amortization and maint.            | 717.75 ± 0.00        | 717.75 ± 0.00       | 73.98 ± 0.00      | 98.64 ± 36.99     | 865.71 ± 0.00        | 717.75 ± 0.00       | 147.96 ± 0.00      | 147.96 ± 0.00     | 147.96 ± 0.00     | 865.71 ± 0.00        |
| Insurance and taxes                | 467.11 ± 257.71      | 273.77 ± 76.88      | 0.00 ± 0.00       | 0.00 ± 0.00       | 273.77 ± 76.88       | 219.41 ± 147.08     | 0.00 ± 0.00        | 0.00 ± 0.00       | 0.00 ± 0.00       | 219.41 ± 147.08      |
| <b>TOTAL FIXED COSTS</b>           | 1,184.86a ± 257.71   | 991.52 ± 76.88      | 73.98 ± 0.00      | 98.64 ± 36.99     | 1,139.48a ± 76.88    | 937.15 ± 147.08     | 147.96 ± 0.00      | 147.96 ± 0.00     | 147.96 ± 0.00     | 1,085.12a ± 147.08   |
| <b>NET MARGIN<sup>2</sup></b>      | 4,607.03a ± 4,836.48 | 1,570.80 ± 1,559.23 | -1,341.66 ± 95.54 | 383.20 ± 878.05   | 1,059.55a ± 1,302.65 | 632.68 ± 2,784.91   | -1,290.83 ± 522.03 | 2,525.23 ± 437.84 | -1,423.38 ± 52.61 | 569.69a ± 4,200.76   |
| Interest of fixed capital          | 21.53 ± 0.00         | 21.53 ± 0.00        | 2.22 ± 0.00       | 2.96 ± 1.11       | 25.97 ± 0.00         | 21.53 ± 0.00        | 4.44 ± 0.00        | 4.44 ± 0.00       | 4.44 ± 0.00       | 25.97 ± 0.00         |



|                                |                             |                            |                          |                        |                           |                          |                           |                          |                          |                           |
|--------------------------------|-----------------------------|----------------------------|--------------------------|------------------------|---------------------------|--------------------------|---------------------------|--------------------------|--------------------------|---------------------------|
| Interest of variable capital   | 47.53 ± 1.38                | 39.55 ± 3.47               | 24.81 ± 2.12             | 30.58 ± 6.19           | 86.67 ± 19.00             | 38.58 ± 4.37             | 25.67 ± 0.00              | 75.14 ± 0.00             | 21.94 ± 0.00             | 79.49 ± 24.74             |
| Land rental                    | 200.00 ± 0.00               | 200.00 ± 0.00              |                          |                        | 200.00 ± 0.00             | 200.00 ± 0.00            |                           |                          |                          | 200.00 ± 0.00             |
| <b>TOTAL OPPORTUNITY COSTS</b> | 269.06a ± 1.38              | 261.09 ± 3.47              | 27.03 ± 2.12             | 33.54 ± 5.56           | 312.64b ± 19.00           | 260.11 ± 4.37            | 30.11 ± 0.00              | 79.58 ± 0.00             | 26.38d ± 0.00            | 305.46b ± 24.74           |
| <b>PROFIT<sup>3</sup></b>      | <b>4,337.97a ± 4,837.69</b> | <b>1,309.71 ± 1,561.50</b> | <b>-1,368.69 ± 93.62</b> | <b>349.66 ± 873.37</b> | <b>746.91a ± 1,309.09</b> | <b>372.57 ± 2,786.18</b> | <b>-1,320.94 ± 522.03</b> | <b>2,445.66 ± 437.84</b> | <b>-1,449.77 ± 52.61</b> | <b>264.23a ± 4,180.11</b> |

Note: Different letters indicate significant differences among CTL, D1-Total and D2-Total for each economic indicator, following Tukey's post-hoc test.

<sup>1</sup> Gross Margin = Revenues – Total Variable Costs

<sup>2</sup> Net Margin = Gross margin – Total Fixed Costs

<sup>3</sup> Profit = Net Margin – Total Opportunity Costs
